# Supplementary material for: Vertebrate bacterial gut diversity: size also matters
Source: PubMed Central journal article supplement (PMC4804487; doi:10.1186/s12898-016-0071-2), 2016-03-23

**Additional file 3:**

Simpson Diversity Index as a function of animal weight for (A) all the samples and for the sub-categories; (B) diet; (C) phylogeny; (D) gut structure; (E) age and (F) group size. The power law relationship  $\log_{\text{diversity}} = c \log_{\text{weight}}^z$  is displayed as a red line. Intercept  $c$  and slope  $z$  of the regression are indicated at the bottom of each panel, with the range of values ( $p$ -value 0.05) in brackets. The prevision and confidence intervals of the linear regression are displayed as dashed and dotted lines respectively.

**(A) All the samples**

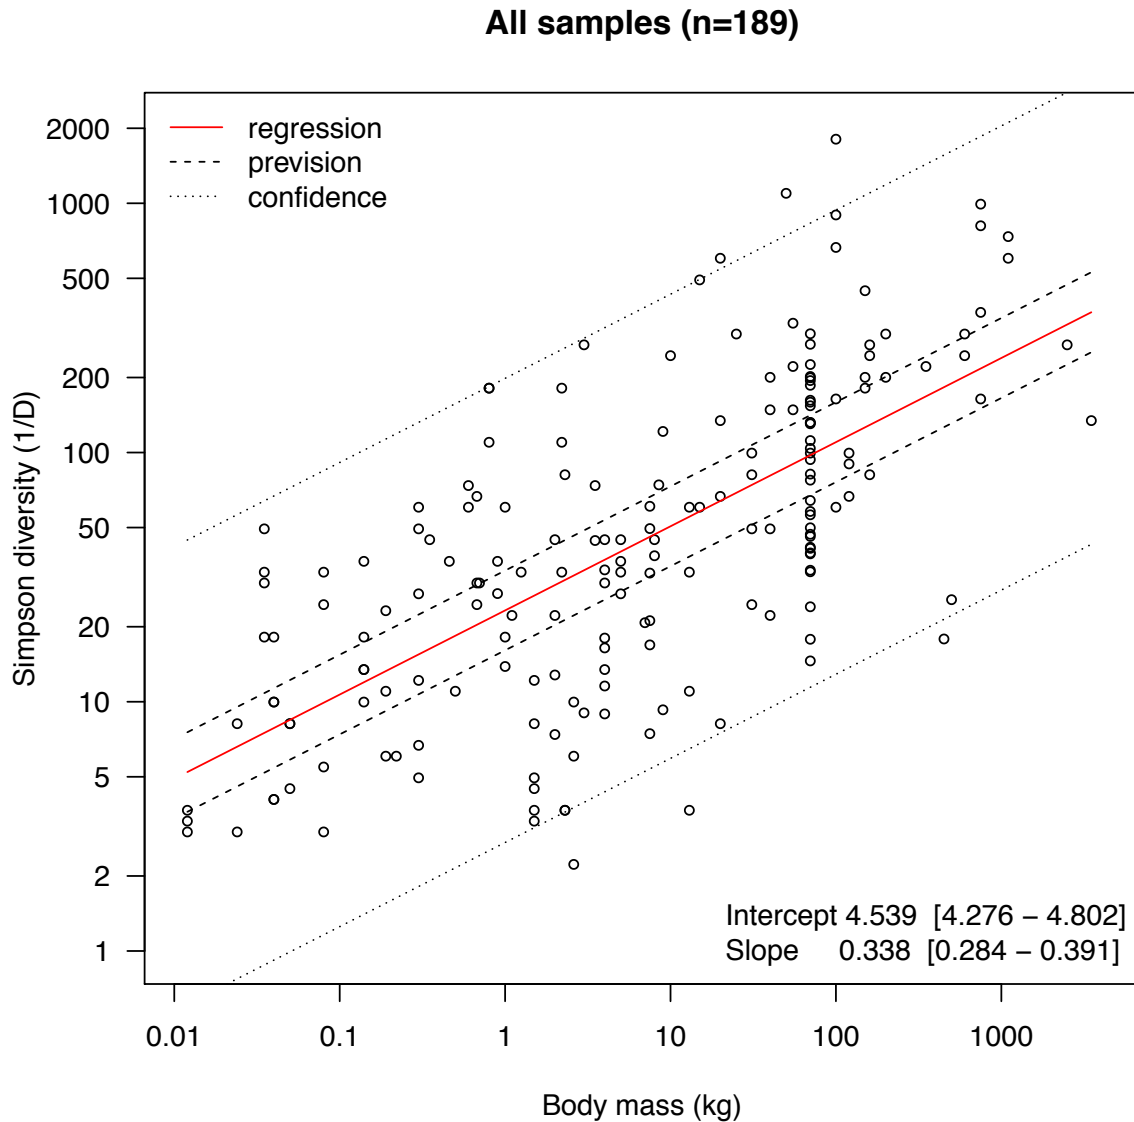

## (B) Diet

### Granivorous (n=54)

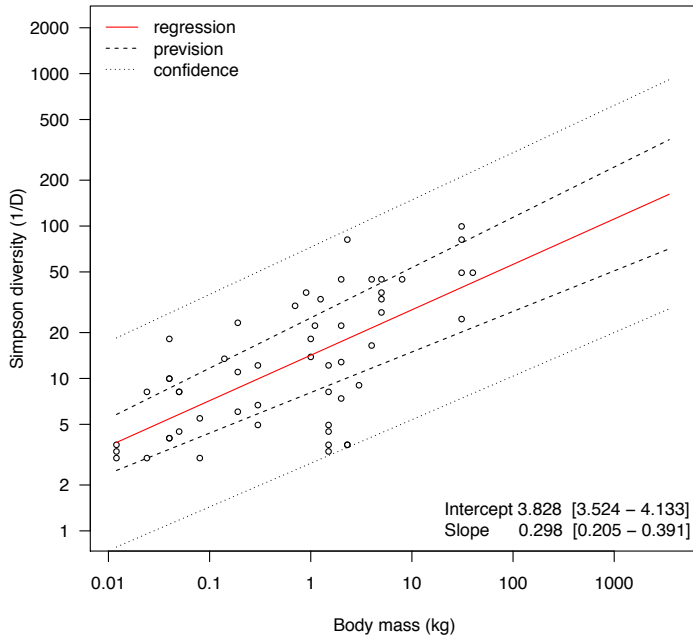

### Omnivorous (n=60)

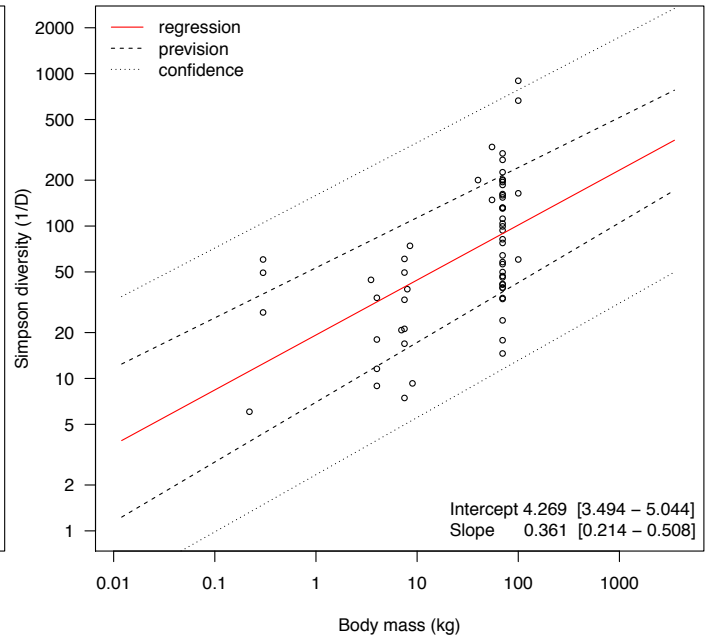

### Herbivorous (n=44)

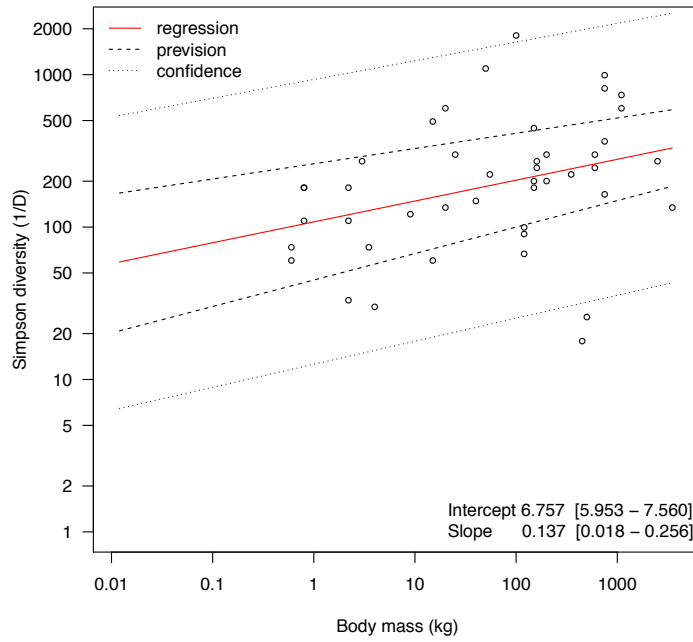

### (C) Phylogeny

#### Birds (n=85)

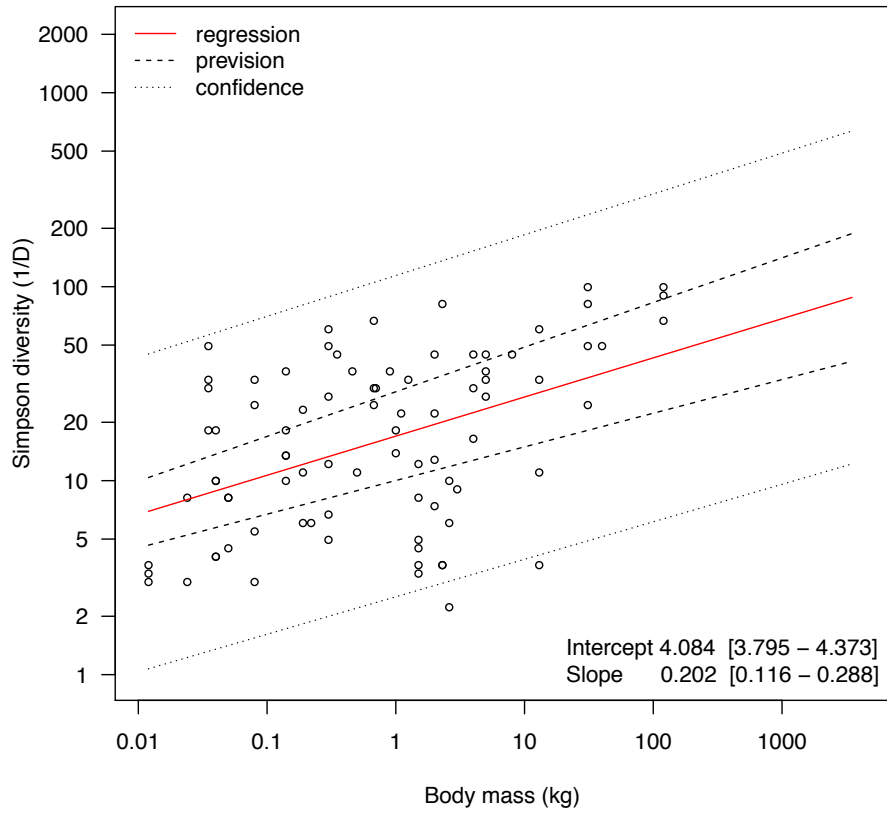

#### Mammals (n=101)

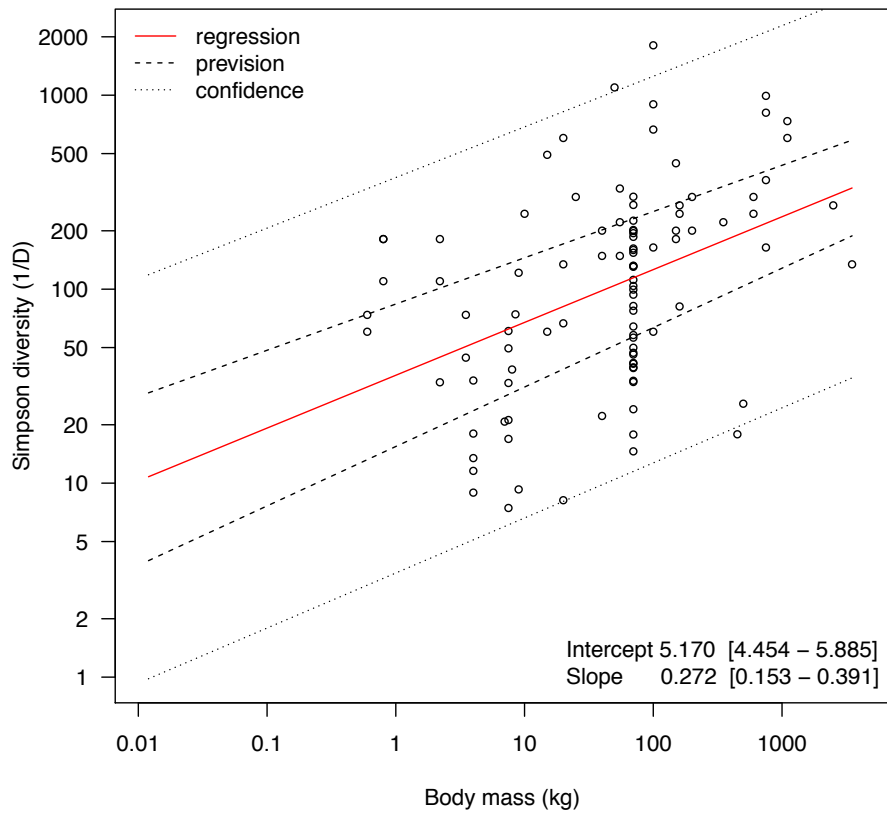

## (D) Gut structure

### Hindgut caecum (n=46)

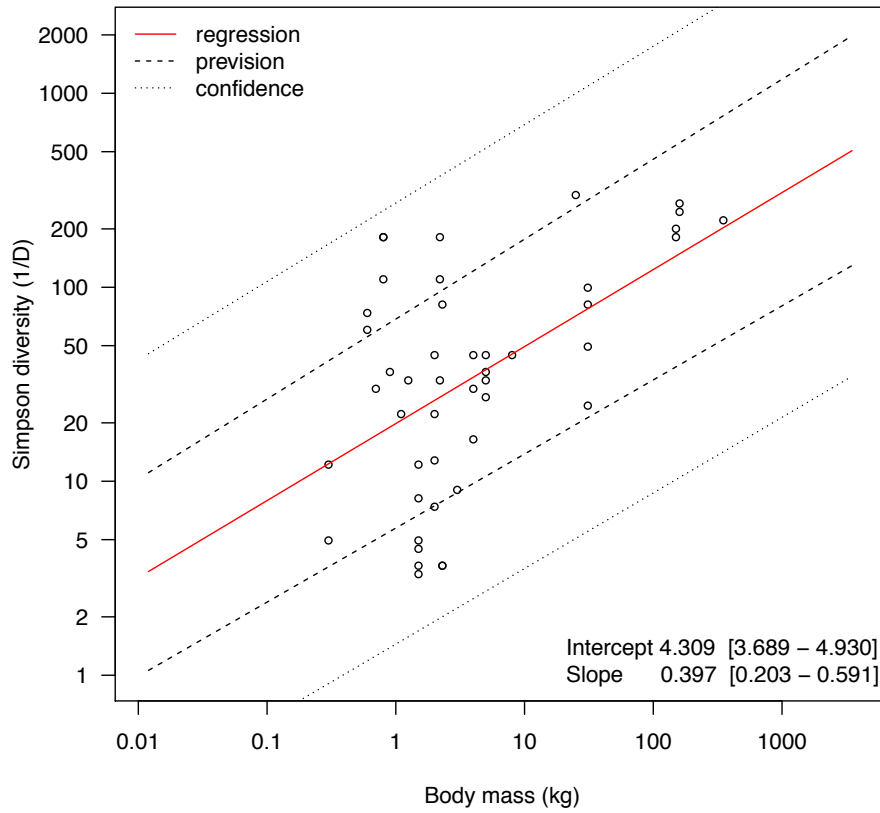

### Hindgut colon (n=124)

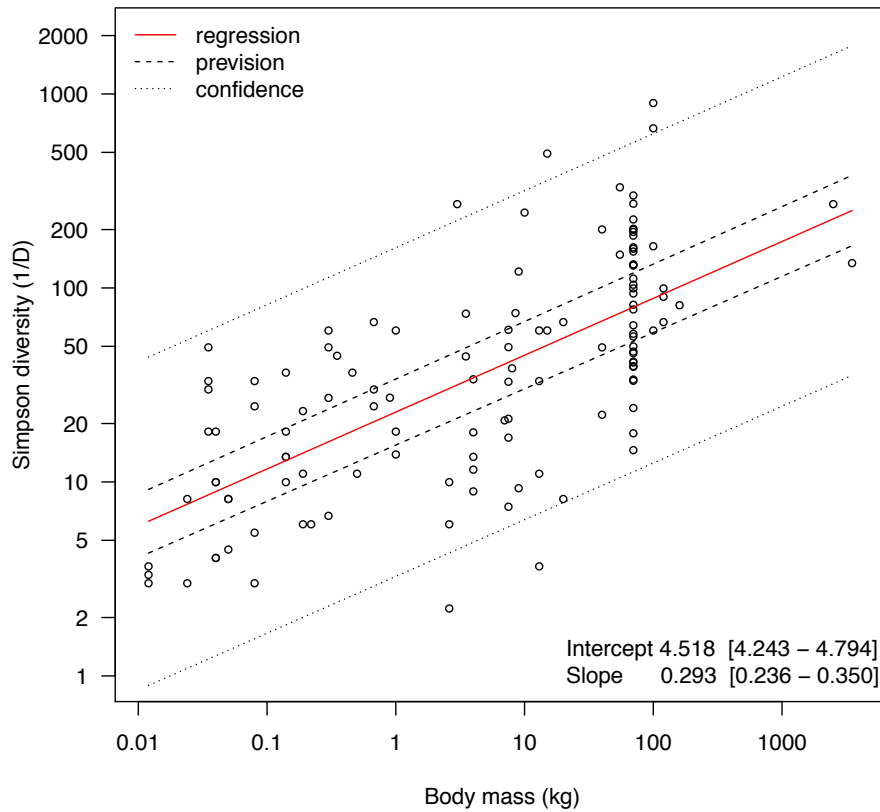

(E) Age

Adults (n=173)

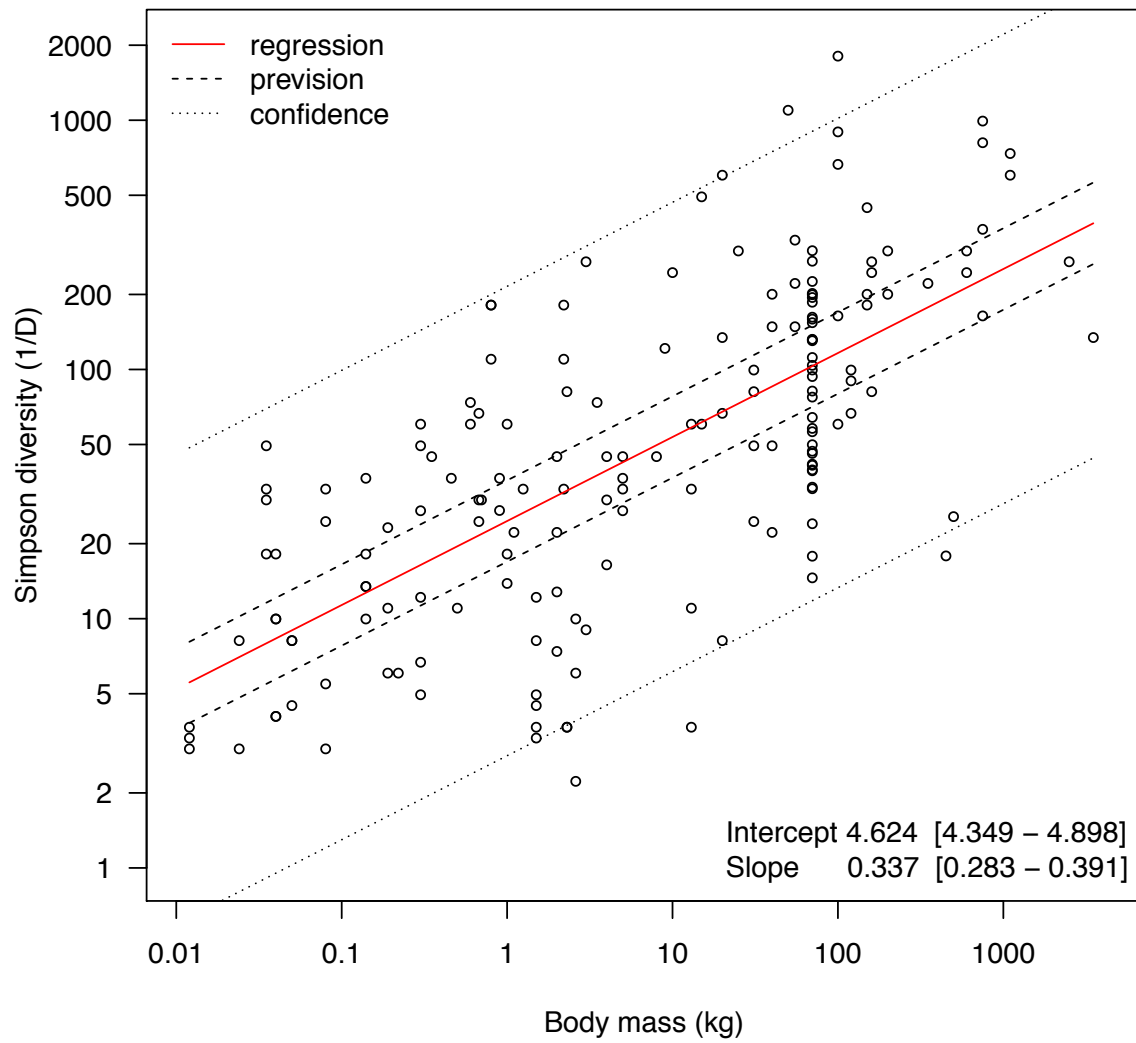

## (F) Group size

### Large groups (n=85)

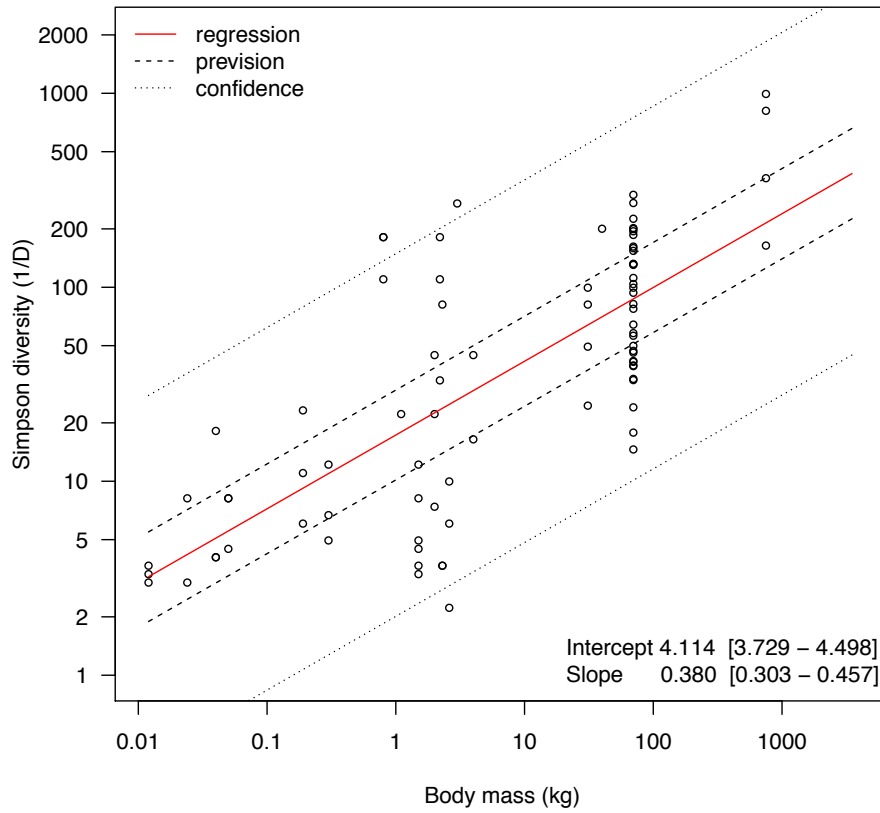

### Small groups (n=104)

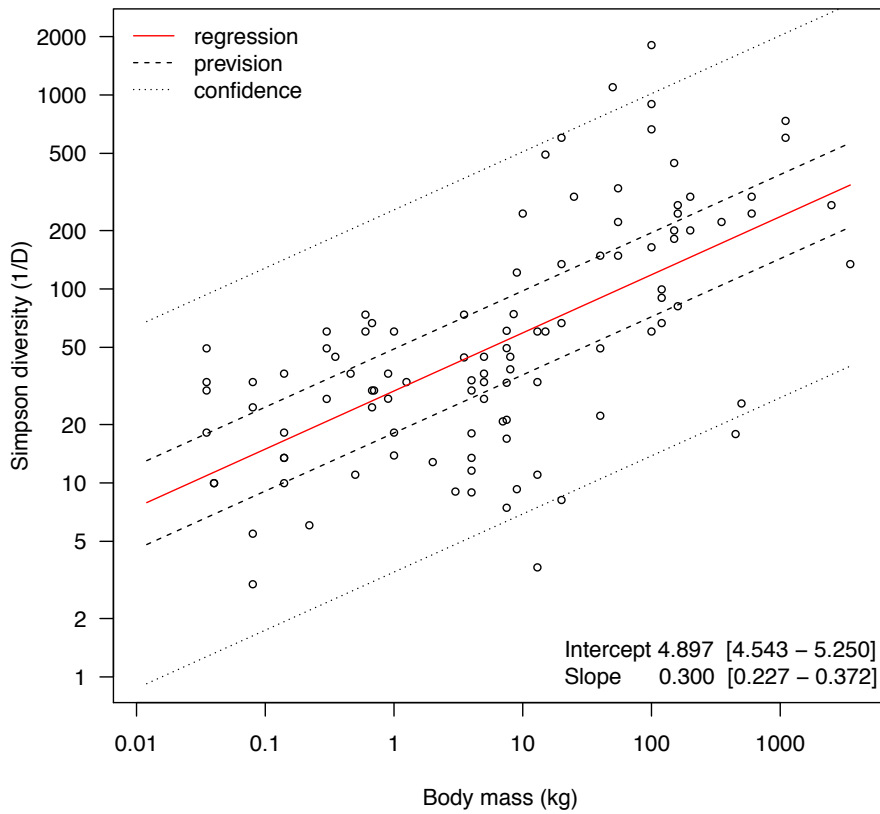

Supplement: 12898_2016_71_MOESM3_ESM.pdf [file 12898_2016_71_MOESM3_ESM.pdf]
