# Supplementary material for: Vertebrate bacterial gut diversity: size also matters
Source: PubMed Central journal article supplement (PMC4804487; doi:10.1186/s12898-016-0071-2), 2016-03-23

## Additional file 1:

Examples of representative CE-SSCP fingerprinting patterns from low-diverse to high-diverse samples.

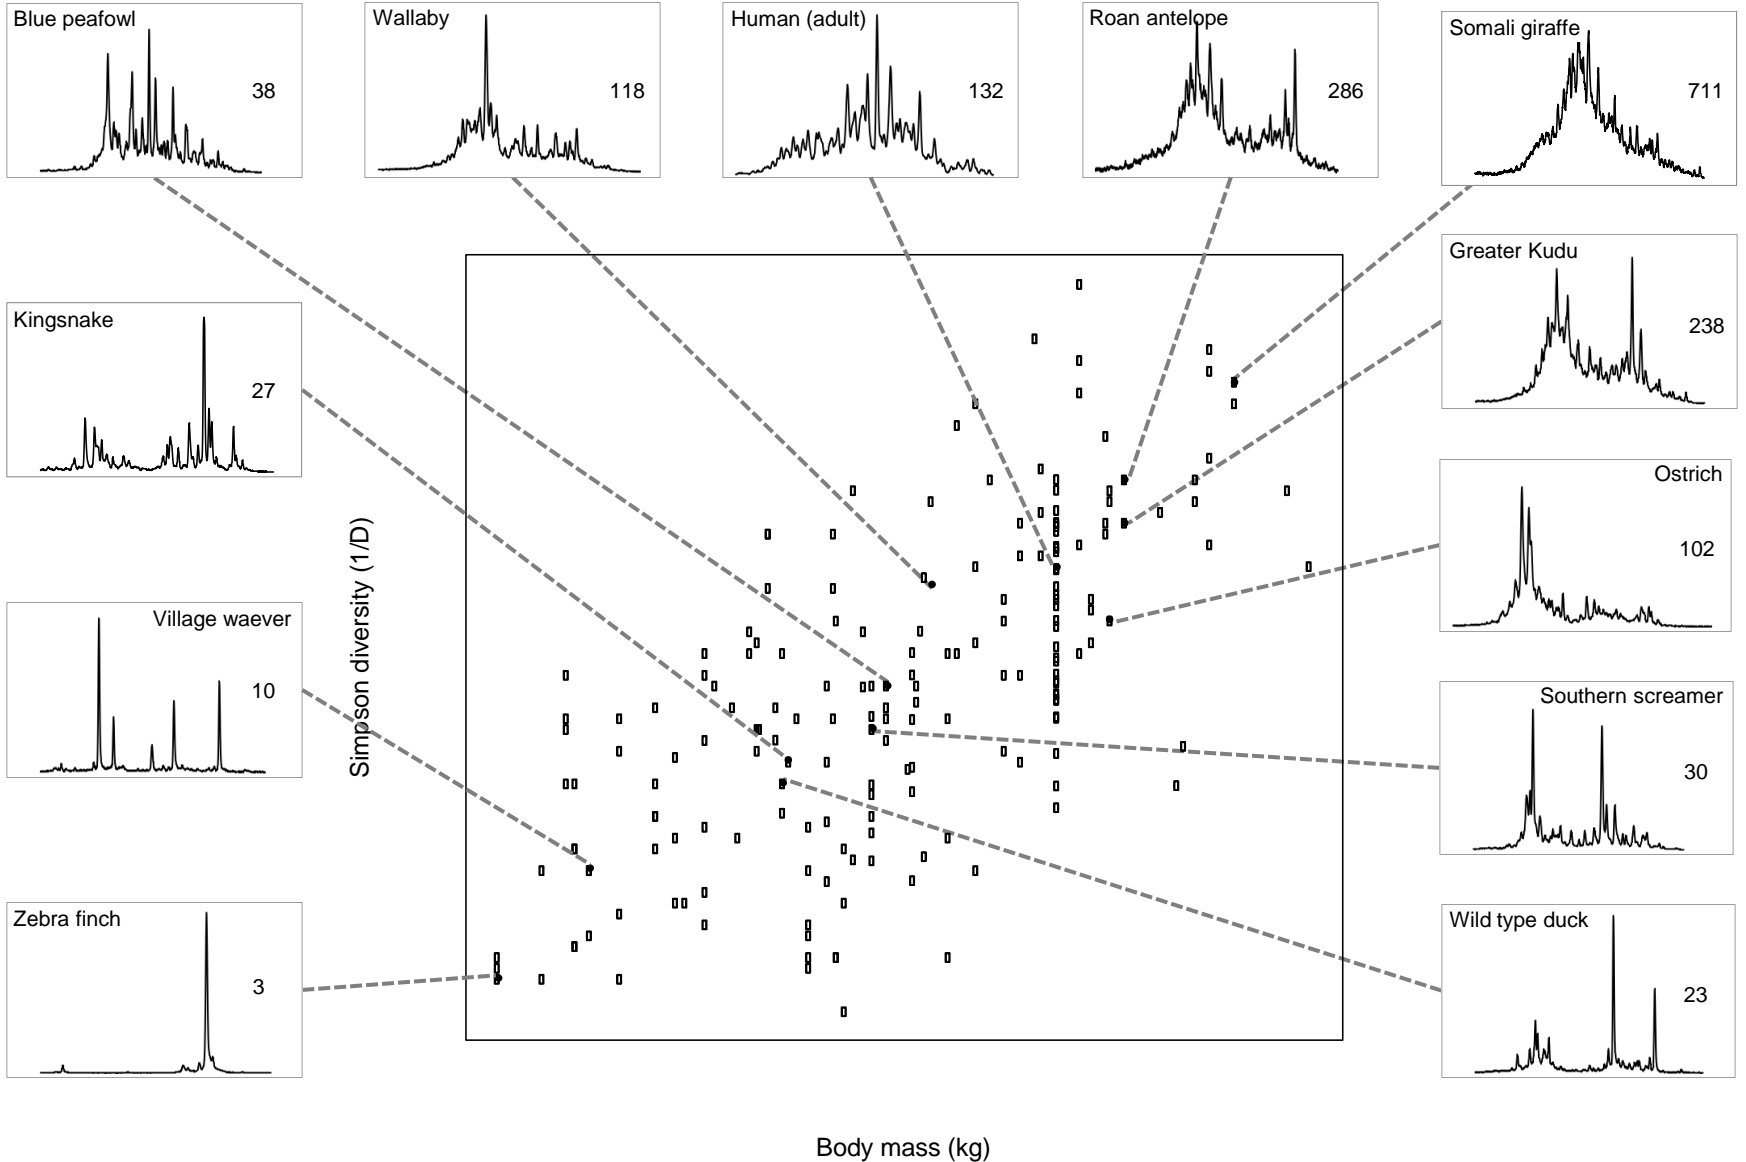

Supplement: 12898_2016_71_MOESM1_ESM.pdf [file 12898_2016_71_MOESM1_ESM.pdf]
