# Supplementary material for: Vertebrate bacterial gut diversity: size also matters
Source: PubMed Central journal article supplement (PMC4804487; doi:10.1186/s12898-016-0071-2), 2016-03-23

**Additional file 2:**

Simpson Diversity Index calculated from 671 CE-SSCP fingerprinting patterns. Samples were grouped according to their ecosystem of origin (Y-axis) and the number of samples from each ecosystem is indicated in bracket after the ecosystem name. Boxes represent dispersion of data from the first quartile to the third quartile, with median inside. Standard deviation above and below the mean of the data is displayed as dotted lines. Boxplot is ordered with increasing median value of diversity.

**Range of diversity among ecosystems**

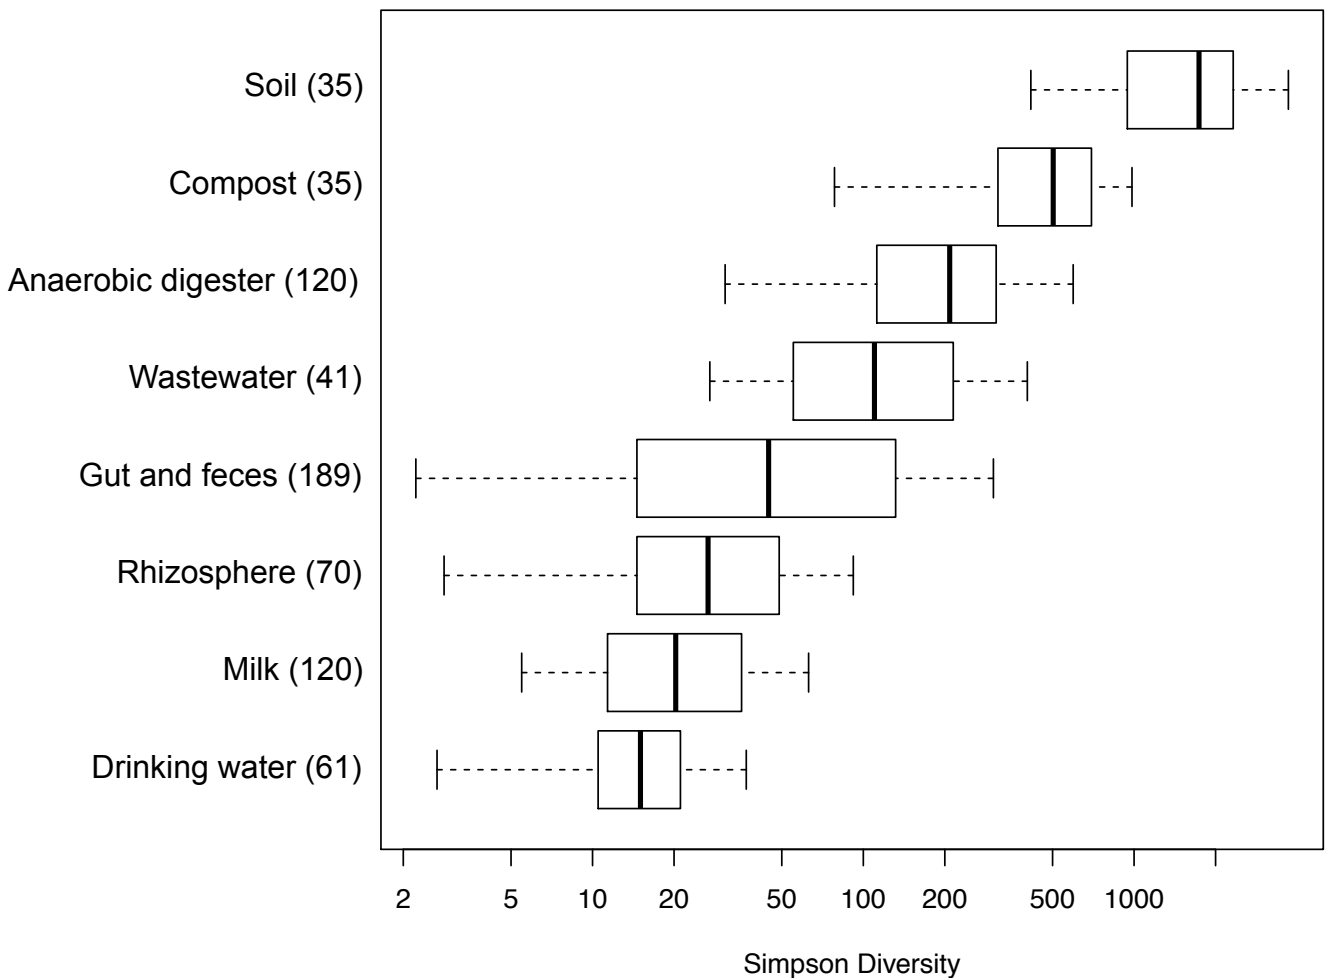

Supplement: 12898_2016_71_MOESM2_ESM.pdf [file 12898_2016_71_MOESM2_ESM.pdf]
